# Supplementary material for: Parametric and Nonparametric Population Pharmacokinetic Models to Assess Probability of Target Attainment of Imipenem Concentrations in Critically Ill Patients
Source: MDPI journal article supplement (doi:10.3390/pharmaceutics13122170), 2021-12-16
Supplement: s1 [file s1]

# Supplementary Materials: Parametric and Nonparametric Population Pharmacokinetic Models to Assess Probability of Target Attainment of Imipenem Concentrations in Critically Ill Patients

Femke de Velde, Brenda C. M. de Winter, Michael N. Neely, Jan Strojil, Walter M. Yamada, Stephan Harbarth, Angela Huttner, Teun van Gelder, Birgit C. P. Koch, Anouk E. Muller  
on behalf of the COMBACTE-NET Consortium <sup>†</sup>

**Table S1.** Population parameter estimates.  $V_c$ : central distribution volume,  $K_{cp}$ : rate constant from central to peripheral compartment,  $K_{pc}$ : rate constant from peripheral to central compartment,  $K_e$ : elimination rate constant,  $K_{ecov}$ : covariate effect on  $K_e$ , CV: coefficient of variation.

| Parameter                                           | NONMEM             |        | Pmetrics                |        |
|-----------------------------------------------------|--------------------|--------|-------------------------|--------|
|                                                     | Parameter estimate | CV (%) | Mean parameter estimate | CV (%) |
| $V_c$ (L)                                           | 29.6               | -      | 31.1                    | 42.6   |
| $K_{cp}$ ( $h^{-1}$ )                               | 0.166              | -      | 0.374                   | 81.2   |
| $K_{pc}$ ( $h^{-1}$ )                               | 0.195              | -      | 0.495                   | 72.0   |
| $K_e$ ( $h^{-1}$ )                                  | 0.637              | 19.0   | 0.681                   | 34.0   |
| $K_{ecov}$                                          | 0.655              | -      | 0.658                   | 55.2   |
| Parametric model (NONMEM): exponential error (mg/L) | 0.348              | -      | N/A                     | -      |
| Nonparametric model (Pmetrics): gamma (error model) | N/A                | -      | 3.40                    | -      |

**Table S2.** Probabilities of target attainment (PTA) for targets of 50% and 100%  $fT_{>MIC}$  attained by several imipenem dosing regimens and eGFR values (measured by the CKD-EPI equation unadjusted for BSA) of 150, 120 and 90 mL/min. The PTAs were calculated by Monte Carlo simulations ( $n = 5000$ ) using parametric (a) and nonparametric (b) popPK models. The grey shaded cells indicate the highest MIC for which the PTA is higher than 97.5%.

**Table S2a.** PTA simulations using the parametric model.

| eGFR (mL/min) | Dose regimen | Target $fT_{>MIC}$ | PTA (%) at specified MIC (mg/L) |      |      |       |      |     |     |    |    |   |    |    |    |  |
|---------------|--------------|--------------------|---------------------------------|------|------|-------|------|-----|-----|----|----|---|----|----|----|--|
|               |              |                    | 0.015                           | 0.03 | 0.06 | 0.125 | 0.25 | 0.5 | 1   | 2  | 4  | 8 | 16 | 32 | 64 |  |
| 150           | 500mg q6h    | 100%               | 100                             | 100  | 100  | 99    | 81   | 22  | 0   | 0  | 0  | 0 | 0  | 0  | 0  |  |
|               | 1000mg q8h   | 100%               | 100                             | 100  | 100  | 100   | 95   | 47  | 4   | 0  | 0  | 0 | 0  | 0  | 0  |  |
|               | 1000mg q6h   | 100%               | 100                             | 100  | 100  | 100   | 99   | 84  | 27  | 1  | 0  | 0 | 0  | 0  | 0  |  |
|               | 500mg q6h    | 50%                | 100                             | 100  | 100  | 100   | 100  | 100 | 84  | 15 | 0  | 0 | 0  | 0  | 0  |  |
|               | 1000mg q8h   | 50%                | 100                             | 100  | 100  | 100   | 100  | 100 | 91  | 40 | 1  | 0 | 0  | 0  | 0  |  |
|               | 1000mg q6h   | 50%                | 100                             | 100  | 100  | 100   | 100  | 100 | 100 | 94 | 32 | 0 | 0  | 0  | 0  |  |
| 120           | 500mg q6h    | 100%               | 100                             | 100  | 100  | 100   | 94   | 50  | 3   | 0  | 0  | 0 | 0  | 0  | 0  |  |
|               | 1000mg q8h   | 100%               | 100                             | 100  | 100  | 100   | 99   | 76  | 15  | 0  | 0  | 0 | 0  | 0  | 0  |  |
|               | 1000mg q6h   | 100%               | 100                             | 100  | 100  | 100   | 100  | 96  | 58  | 5  | 0  | 0 | 0  | 0  | 0  |  |
|               | 500mg q6h    | 50%                | 100                             | 100  | 100  | 100   | 100  | 100 | 96  | 39 | 0  | 0 | 0  | 0  | 0  |  |
|               | 1000mg q8h   | 50%                | 100                             | 100  | 100  | 100   | 100  | 100 | 98  | 71 | 6  | 0 | 0  | 0  | 0  |  |
|               | 1000mg q6h   | 50%                | 100                             | 100  | 100  | 100   | 100  | 100 | 100 | 99 | 63 | 0 | 0  | 0  | 0  |  |
| 90            | 500mg q6h    | 100%               | 100                             | 100  | 100  | 100   | 100  | 84  | 21  | 0  | 0  | 0 | 0  | 0  | 0  |  |
|               | 1000mg q8h   | 100%               | 100                             | 100  | 100  | 100   | 100  | 96  | 50  | 2  | 0  | 0 | 0  | 0  | 0  |  |
|               | 1000mg q6h   | 100%               | 100                             | 100  | 100  | 100   | 100  | 100 | 88  | 26 | 0  | 0 | 0  | 0  | 0  |  |
|               | 500mg q6h    | 50%                | 100                             | 100  | 100  | 100   | 100  | 100 | 100 | 77 | 1  | 0 | 0  | 0  | 0  |  |
|               | 1000mg q8h   | 50%                | 100                             | 100  | 100  | 100   | 100  | 100 | 100 | 93 | 28 | 0 | 0  | 0  | 0  |  |

|            |     |     |     |     |     |     |     |     |     |     |    |   |   |   |   |
|------------|-----|-----|-----|-----|-----|-----|-----|-----|-----|-----|----|---|---|---|---|
| 1000mg q6h | 50% | 100 | 100 | 100 | 100 | 100 | 100 | 100 | 100 | 100 | 90 | 4 | 0 | 0 | 0 |
|------------|-----|-----|-----|-----|-----|-----|-----|-----|-----|-----|----|---|---|---|---|

**Table S2b.** PTA simulations using the nonparametric model.

| eGFR (mL/min) | Dose regimen | Target $fT_{>MIC}$ | PTA (%) at specified MIC (mg/L) |      |      |       |      |     |     |    |    |    |    |    |    |
|---------------|--------------|--------------------|---------------------------------|------|------|-------|------|-----|-----|----|----|----|----|----|----|
|               |              |                    | 0.015                           | 0.03 | 0.06 | 0.125 | 0.25 | 0.5 | 1   | 2  | 4  | 8  | 16 | 32 | 64 |
| 150           | 500mg q6h    | 100%               | 100                             | 99   | 98   | 92    | 78   | 47  | 13  | 2  | 1  | 0  | 0  | 0  | 0  |
|               | 1000mg q8h   | 100%               | 99                              | 99   | 96   | 90    | 79   | 56  | 24  | 4  | 1  | 0  | 0  | 0  | 0  |
|               | 1000mg q6h   | 100%               | 100                             | 100  | 100  | 98    | 94   | 81  | 39  | 6  | 1  | 0  | 0  | 0  | 0  |
|               | 500mg q6h    | 50%                | 100                             | 100  | 100  | 100   | 100  | 96  | 74  | 25 | 5  | 1  | 0  | 0  | 0  |
|               | 1000mg q8h   | 50%                | 100                             | 100  | 100  | 100   | 100  | 98  | 87  | 49 | 13 | 2  | 0  | 0  | 0  |
|               | 1000mg q6h   | 50%                | 100                             | 100  | 100  | 100   | 100  | 100 | 98  | 81 | 31 | 5  | 1  | 0  | 0  |
| 120           | 500mg q6h    | 100%               | 100                             | 100  | 100  | 98    | 91   | 64  | 20  | 3  | 1  | 0  | 0  | 0  | 0  |
|               | 1000mg q8h   | 100%               | 100                             | 100  | 99   | 97    | 90   | 72  | 35  | 6  | 1  | 0  | 0  | 0  | 0  |
|               | 1000mg q6h   | 100%               | 100                             | 100  | 100  | 100   | 99   | 93  | 52  | 10 | 2  | 1  | 0  | 0  | 0  |
|               | 500mg q6h    | 50%                | 100                             | 100  | 100  | 100   | 100  | 99  | 88  | 39 | 7  | 2  | 1  | 0  | 0  |
|               | 1000mg q8h   | 50%                | 100                             | 100  | 100  | 100   | 100  | 100 | 96  | 67 | 20 | 3  | 1  | 0  | 0  |
|               | 1000mg q6h   | 50%                | 100                             | 100  | 100  | 100   | 100  | 100 | 99  | 91 | 44 | 8  | 1  | 1  | 0  |
| 90            | 500mg q6h    | 100%               | 100                             | 100  | 100  | 100   | 98   | 87  | 36  | 6  | 2  | 1  | 0  | 0  | 0  |
|               | 1000mg q8h   | 100%               | 100                             | 100  | 100  | 100   | 99   | 91  | 57  | 11 | 2  | 1  | 0  | 0  | 0  |
|               | 1000mg q6h   | 100%               | 100                             | 100  | 100  | 100   | 100  | 99  | 67  | 15 | 4  | 1  | 0  | 0  | 0  |
|               | 500mg q6h    | 50%                | 100                             | 100  | 100  | 100   | 100  | 100 | 95  | 59 | 13 | 3  | 1  | 0  | 0  |
|               | 1000mg q8h   | 50%                | 100                             | 100  | 100  | 100   | 100  | 100 | 98  | 85 | 36 | 6  | 1  | 0  | 0  |
|               | 1000mg q6h   | 50%                | 100                             | 100  | 100  | 100   | 100  | 100 | 100 | 97 | 63 | 15 | 3  | 1  | 0  |
